# Supplementary material
Source: Springer Nature journal article supplement (https://www.springermedizin.de/resource/supplementary/12889_2010_2363_MOESM1_ESM.pdf/9485570)

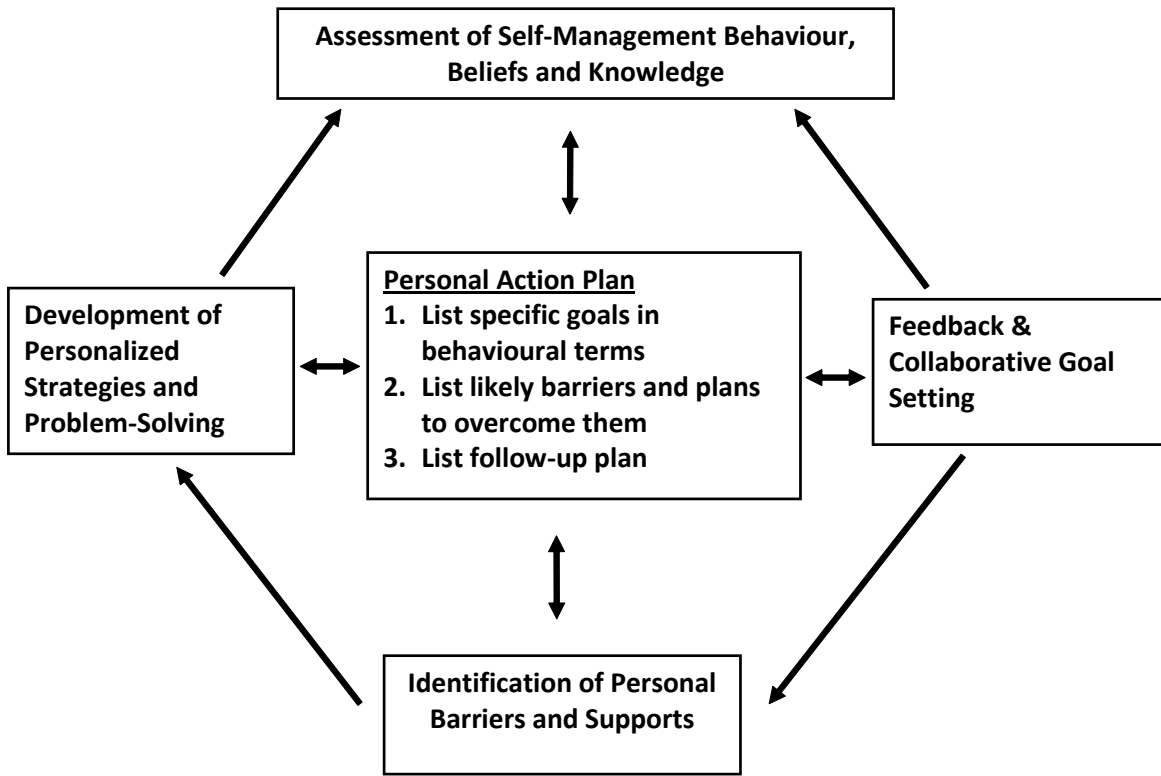

Supplement: MOESM1 [file 9485570]
